# Supplementary figures and images for: Material properties of phase-separated TFEB condensates regulate the autophagy-lysosome pathway
Source: PubMed Central journal article supplement — J Cell Biol. 2022 Mar 16;221(5):e202112024. doi: 10.1083/jcb.202112024 (PMC8931539; doi:10.1083/jcb.202112024), 2022-03-16

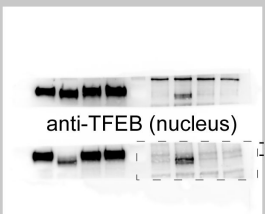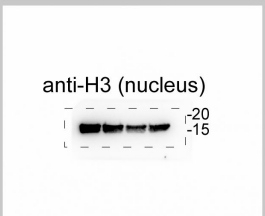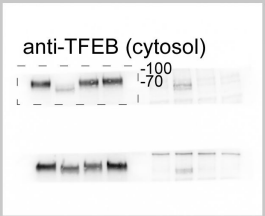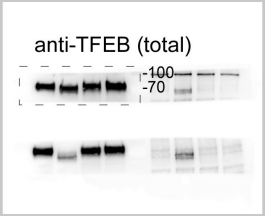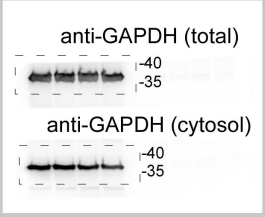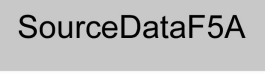

SourceDataF5A

Supplement: JCB_202112024_SourceDataF5.pdf [file JCB_202112024_SourceDataF5.pdf]

anti-LC3

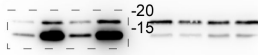

anti-p62

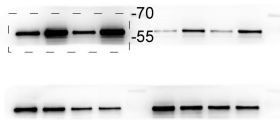

anti-GAPDH

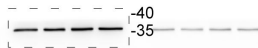

SourceDataF6E

Supplement: JCB_202112024_SourceDataF6.pdf [file JCB_202112024_SourceDataF6.pdf]

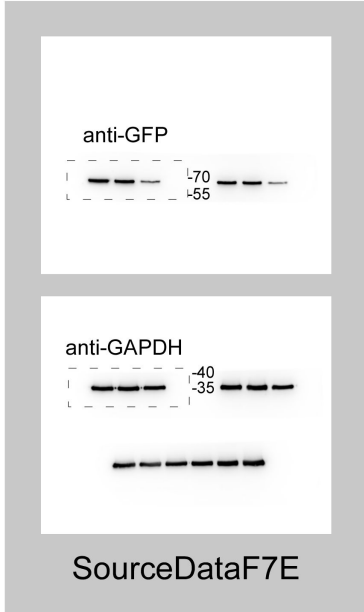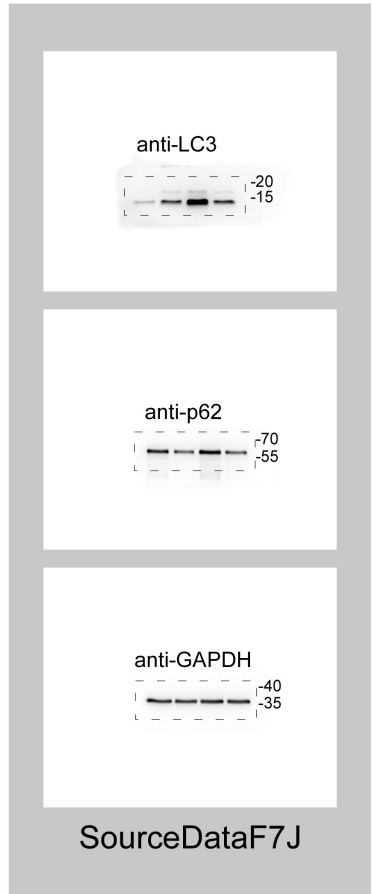

Supplement: JCB_202112024_SourceDataF7.pdf [file JCB_202112024_SourceDataF7.pdf]

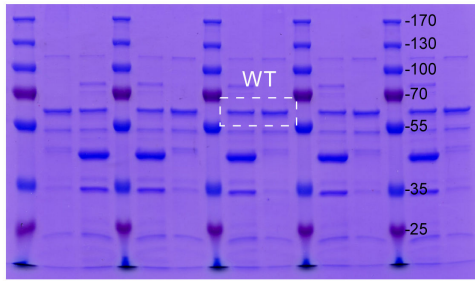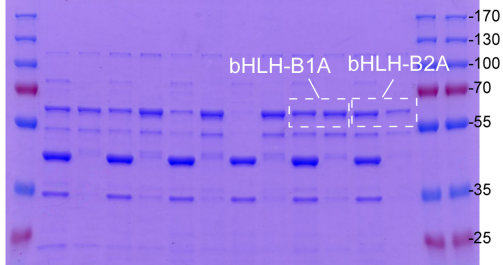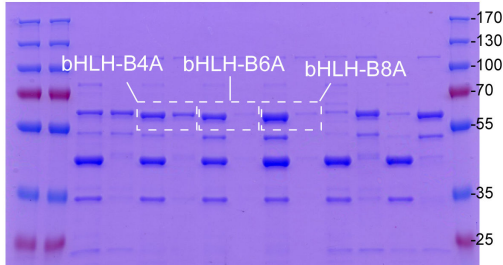

SourceDataFS1V

Supplement: JCB_202112024_SourceDataFS1.pdf [file JCB_202112024_SourceDataFS1.pdf]

anti-LAMP1

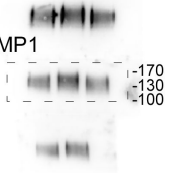

pre-CTSD

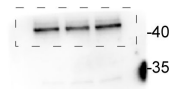

mature-CTSD

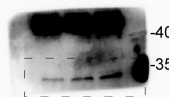

anti-GAPDH

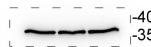

Supplement: JCB_202112024_SourceDataFS3.pdf [file JCB_202112024_SourceDataFS3.pdf]
